# Supplementary material for: The 5-chlorouracil:7-deazaadenine base pair as an alternative to the dT:dA base pair
Source: Royal Society of Chemistry journal article supplement (doi:10.1039/c6ob02274j), 2016-12-05
Supplement: c6ob02274j1.pdf [file c6ob02274j1.pdf]

## Supporting information

### The 5-chlorouracil:7-deazaadenine as an alternative to dT:dA base pair

E. Ereemeeva,<sup>a</sup> M. Abramov,<sup>a</sup> P. Marlière,<sup>b</sup> and P. Herdewijn<sup>\*a,b</sup>

<sup>a</sup> KU Leuven, Rega Institute for Medical Research, Laboratory for Medicinal Chemistry. Minderbroedersstraat 10, BE-3000 Leuven, Belgium.

<sup>b</sup> iSSB, Genopole, CNRS, UEVE, Université Paris-Saclay, [optionally, pending journal policy, some address details or none], Évry, France

#### CONTENTS

|                            |     |
|----------------------------|-----|
| EXPERIMENTAL SECTION ..... | S2  |
| SUPPORTING TABLES .....    | S4  |
| SUPPORTING FIGURES .....   | S7  |
| REFERENCES .....           | S12 |

## EXPERIMENTAL SECTION

### Synthesis of phosphoramidites and oligonucleotides

**General.** For all reactions, analytical grade solvents were used. All moisture-sensitive reactions were carried out in oven-dried glassware under N<sub>2</sub>. Reagents and solvents were provided by Acros (Fluka) or TCI. TLC: Pre-coated aluminum sheets (Fluka silica gel/TLC cards, 254 nm); the spots were visualized with UV light. Column chromatography (CC): ICN silica gel 63–200 60 P. <sup>31</sup>P-NMR spectra: a Bruker Avance 300-MHz, or a Bruker Avance 500-MHz spectrometer. Exact mass measurements were performed on a quadrupole time-of-flight mass spectrometer (Q-ToF-2, Micromass, Manchester, UK) equipped with a standard electrospray-ionization (ESI) interface; samples were infused in i-PrOH/H<sub>2</sub>O 1 : 1 at 3 cm<sup>3</sup>/min.

The phosphoramidites were incorporated into the DNA sequences through solid-phase DNA synthesis<sup>1</sup> on an automated RNA synthesizer (for structures of chemically modified nucleotide monomers see Table S3). A<sub>1</sub>, A<sub>3</sub>, and T<sub>1</sub> containing modified oligonucleotides were obtained by using commercially available amidites (Glen Research). The chemical synthesis of A<sub>2</sub> modified phosphoramidite is previously described.<sup>2,3</sup> The T<sub>2</sub> and T<sub>3</sub> phosphoramidite were synthesized as O<sup>5'</sup>-DMTr derivatives starting from 5-chloro-2'-deoxyuridine<sup>4</sup> and commercial 5-ethyl-2'-deoxyuridine, respectively.

For a standard DNA synthesis cycle (1 μmol scale), O<sup>5'</sup>-DMTr protected DNA phosphoramidites for ultramild DNA synthesis (Glen Research) and common reagents were used and the stepwise coupling yield of all monomers was >99%. Following standard deprotection, purification and workup, the composition and purity (>90%) of the resulting oligonucleotides was confirmed by MALDI-MS analysis and ion exchange HPLC.

Melting temperatures (T<sub>m</sub>) values were measured as the maximum of the first derivative of the melting curve (A<sub>260</sub> and A<sub>270</sub> vs. temperature 10 to 85 °C and 85 to 10 °C; increase 1 °C min<sup>-1</sup>) recorded in medium salt buffer (10 mM sodium phosphate, 100 mM sodium chloride, 0.1 mM EDTA, pH 7.0) using 4 μM concentrations with complementary DNA.

#### ***5'-Dimethoxytrityl-5-chloro-2'-deoxyuridine, 3'-[(2-cyanoethyl)-(N,N-diisopropyl)]-phosphoramidite.***

To a colorless solution of 5-chloro-2'-deoxyuridine<sup>4</sup> (600 mg, 2.28 mmol) in pyridine (20 mL) DMTrCl (930 mg, 2.75 mmol) was added in one portion at RT. The reaction mixture was stirred for 12 h and turn to yellow-orange color. When the starting material has disappeared the reaction mixture was cooled in an ice bath, methanol (1 mL) was added, and the reaction mixture was concentrated and co-evaporated twice with toluene. The residue was dissolved in DCM, washed with H<sub>2</sub>O, dried over Na<sub>2</sub>SO<sub>4</sub>, and purified by column chromatography on silica gel to yield 5'-O-dimethoxytrityl-5-chloro-2'-deoxyuridine (1.08g, 84%). The separated compound (1.08 g, 1.91 mmol) was dissolved in DCM (10 mL) and cooled in an ice-bath. DIPEA (1.5 mL, 8.76 mmol) and 2-cyanoethyl N,N-diisopropylchlorophosphoramidite (0.58 mL, 2.6 mmol) were added. The reaction solution was stirred for 30 min at RT. Upon completion the reaction mixture was concentrated and coevaporated twice with toluene. The crude material was purified by column chromatography on silica to yield 5'-dimethoxytrityl-5-chloro-2'-deoxyuridine, 3'-[(2-cyanoethyl)-(N,N-diisopropyl)]-phosphoramidite (1.0 g, 68%). <sup>31</sup>P NMR (CDCl<sub>3</sub>, 25 °C): δ = 149.08, 148.7. HRMS calculated (calcd) for C<sub>39</sub>H<sub>46</sub>ClN<sub>4</sub>O<sub>8</sub>P, [MH<sup>+</sup>] 765.2794, found 765.2820.

#### ***5'-Dimethoxytrityl-5-ethyl-2'-deoxyuridine, 3'-[(2-cyanoethyl)-(N,N-diisopropyl)]-phosphoramidite.***

To a colorless solution of 5-ethyl-2'-deoxyuridine (0.50 g, 1.95 mmol) in pyridine (10 mL) DMTrCl (0.790 g, 2.34 mmol) was added in one portion at RT. The reaction mixture was stirred for 12 h and turn to yellow-orange color. When the starting material has disappeared the reaction mixture was cooled in an ice bath, methanol (1 mL) was added, and the reaction mixture was concentrated and coevaporated twice with toluene. The residue was dissolved in DCM, washed with H<sub>2</sub>O, dried over Na<sub>2</sub>SO<sub>4</sub>, and purified by column chromatography on silica gel to yield 5'-O-dimethoxytrityl-5-ethyl-2'-deoxyuridine (0.95 g, 87%). The separated compound (0.95 g, 1.7 mmol) was dissolved in DCM (5 mL) and cooled in an ice-bath. DIPEA (1.45 mL, 8.4 mmol) and 2-cyanoethyl N,N-diisopropylchlorophosphoramidite (0.62 mL, 2.8 mmol) were added. The reaction solution was stirred for 30 min at RT. Upon completion the reaction mixture was concentrated and coevaporated twice with toluene. The crude material was purified by column chromatography on silica to yield 5'-dimethoxytrityl-5-ethyl-2'-deoxyuridine, 3'-[(2-cyanoethyl)-(N,N-diisopropyl)]-phosphoramidite (1.2g, 93%). <sup>31</sup>P NMR (CDCl<sub>3</sub>, 25 °C): δ = 148.9, 148.5. HRMS calcd for C<sub>41</sub>H<sub>51</sub>N<sub>4</sub>O<sub>8</sub>P, [MH<sup>+</sup>] 759.3523, found 759.3530.

#### Synthesis of deoxyribonucleoside 5'-triphosphate tetrabutylammonium salt.

**General.** A<sub>1</sub>-A<sub>3</sub>, T<sub>2</sub> 2'-deoxyribonucleosides were converted to their 5'-triphosphates in one-pot reaction by Ludwig method.<sup>5-8</sup> To an ice-cold solution or suspension of corresponding deoxyribonucleoside (0.1 mmol) in trimethyl phosphate (TMP) (1.0 mL) was added phosphoryl chloride (20  $\mu$ L, 0.22 mmol) and the solution was stirred at 0°C for 5 hours. Tributylamine (300  $\mu$ L, 1.6 mmol) and tetrabutylammonium pyrophosphate solution (0.5 M in DMF, 1.1 mmol) were added simultaneously, and the solution was stirred for a further 30 minutes. The reaction was then quenched by the addition of 0.5 M triethylammonium bicarbonate (TEAB) buffer (10 mL), and stored at 4°C overnight. The solvent was evaporated and the residue was treated with 25% ammonia (4 mL). The solution was evaporated to dryness and re-dissolved in water (5 mL) and applied to a Sephadex A25 column in 0.1 M TEAB buffer. The column was eluted with a linear gradient of 0.1-1.0 M TEAB. Appropriate fractions were pooled and evaporated to dryness to give desired product. HPLC (Alltima 5  $\mu$  C-18 reverse phase column 10x250 mm, buffer A, 0.1 M TEAB; buffer B, 0.1 M TEAB, 25% MeCN. 0% to 100% buffer B over 60 minutes at 3 mL/min) showed the product to be pure.

**8-Aza-2'-deoxyadenosine 5'-triphosphate tetrabutylammonium salt.** <sup>31</sup>P NMR (D<sub>2</sub>O):  $\delta$  -7.62 (1P, br s), -11.00 (1P,d), -22.12 (1P, br s). ESIHRMS found:  $m/z$  490.9884. calcd for C<sub>9</sub>H<sub>15</sub>N<sub>6</sub>O<sub>12</sub>P<sub>3</sub>: (M-H)<sup>-</sup> 490.9888.

**8-Aza-7-deaza-2'-deoxyadenosine 5'-triphosphate tetrabutylammonium salt.** <sup>31</sup>P NMR (D<sub>2</sub>O):  $\delta$  -9.80 (1P, d), -10.85 (1P,d), -23.05 (1P, t). ESIHRMS found:  $m/z$  489.9948. calcd for C<sub>10</sub>H<sub>16</sub>N<sub>5</sub>O<sub>12</sub>P<sub>3</sub>: (M-H)<sup>-</sup> 489.9935.

**5-Chloro-2'-deoxyuridine 5'-triphosphate tetrabutylammonium salt.** <sup>31</sup>P NMR (D<sub>2</sub>O):  $\delta$  -7.38 (1P, d), -11.29 (1P, d), -22.18 (1P, t). ESIHRMS found:  $m/z$  500.9279 calcd for C<sub>9</sub>H<sub>14</sub>ClN<sub>2</sub>O<sub>14</sub>P<sub>3</sub>: (M-H)<sup>-</sup> 500.92735

## SUPPORTING TABLES

**Table S1.** pKa and  $\Delta$ pKa of investigated modified Tx and Ax nucleosides

| <div>Tx (pKa) \ Ax (pKa)</div> | A<br>(3.5) | A <sub>1</sub><br>(5.2) | A <sub>2</sub><br>(2.4) | A <sub>3</sub><br>(4.2) |
|--------------------------------|------------|-------------------------|-------------------------|-------------------------|
| T (9.7)                        | 6.2        | 4.5                     | 7.3                     | 5.5                     |
| T <sub>1</sub> (9.3)           | 5.8        | 4.1                     | 6.9                     | 5.1                     |
| T <sub>2</sub> (7.9)           | 4.4        | 2.7                     | 5.5                     | 3.7                     |
| T <sub>3</sub> (9.6)           | 6.1        | 4.4                     | 7.2                     | 5.4                     |

**Table S2.** Full length product formation with modified adenosine triphosphates.<sup>a</sup>

|                 | Mn <sup>2+</sup> | A      |        | A <sub>1</sub> |        | A <sub>2</sub> |        | A <sub>3</sub> |        |
|-----------------|------------------|--------|--------|----------------|--------|----------------|--------|----------------|--------|
|                 |                  | 30 min | 60 min | 30 min         | 60 min | 30 min         | 60 min | 30 min         | 60 min |
| Taq             | -                | 79     | 81     | 79             | 85     | 5              | 15     | 12             | 24     |
|                 | +                | n.d.   | n.d.   | 50             | 67     | 17             | 22     | 12             | 13     |
| Vent            | -                | 90     | 94     | 77             | 89     | 80             | 90     | 18             | 47     |
|                 | +                | n.d.   | n.d.   | 79             | 83     | 88             | 91     | 66             | 73     |
| KF exo-         | -                | 84     | 70     | 85             | 83     | 35             | 25     | 79             | 73     |
|                 | +                | n.d.   | n.d.   | 97             | 86     | 79             | 66     | 84             | 57     |
| PolIII $\alpha$ | -                | 83     | 81     | 60             | 61     | 79             | 79     | 52             | 69     |
|                 | +                | n.d.   | n.d.   | 77             | 75     | 89             | 83     | 78             | 81     |

<sup>a</sup> Yield of full length product is shown as a percentage in the line together with extended non-templated (>P+7) products. N.d. – non determined

**Table S3.** Calculated and found mass spectrometry data for the synthesized oligonucleotides containing A<sub>1</sub>, A<sub>2</sub>, A<sub>3</sub>, T<sub>1</sub>, T<sub>2</sub>, and T<sub>3</sub> modified nucleotides.

|                                                                 |           |              |              |
|-----------------------------------------------------------------|-----------|--------------|--------------|
| <b>A<sub>1</sub> - 7-deaza-dA modified DNAs (5' → 3')</b>       | <b>MS</b> | <b>Calcd</b> | <b>Found</b> |
| CCG TA <sub>1</sub> A ATG ACC                                   |           | 3611.7       | 3611.6       |
| CCG TA <sub>1</sub> A ATG A <sub>1</sub> CC                     |           | 3610.7       | 3610.7       |
| CCG TA <sub>1</sub> A <sub>1</sub> A <sub>1</sub> TG ACC        |           | 3609.7       | 3609.6       |
| <b>A<sub>2</sub> - 8-aza-dA modified DNAs (5' → 3')</b>         | <b>MS</b> | <b>Calcd</b> | <b>Found</b> |
| CCG TA <sub>2</sub> A ATG ACC                                   |           | 3613.7       | 3613.7       |
| CCG TA <sub>2</sub> A ATG A <sub>2</sub> CC                     |           | 3614.6       | 3614.8       |
| CCG TA <sub>2</sub> A <sub>2</sub> A <sub>2</sub> TG ACC        |           | 3615.6       | 3615.8       |
| <b>A<sub>3</sub> - 8-aza-7-deaza-dA modified DNAs (5' → 3')</b> | <b>MS</b> | <b>Calcd</b> | <b>Found</b> |
| CCG TA <sub>3</sub> A ATG ACC                                   |           | 3612.7       | 3613.4       |
| CCG TA <sub>3</sub> A ATG A <sub>3</sub> CC                     |           | 3612.7       | 3612.7       |
| CCG TA <sub>3</sub> A <sub>3</sub> A <sub>3</sub> TG ACC        |           | 3612.7       | 3612.6       |
| <b>T<sub>1</sub> - dU modified DNAs (3' → 5')</b>               | <b>MS</b> | <b>Calcd</b> | <b>Found</b> |
| GGC AT <sub>1</sub> T TAC TGG                                   |           | 3660.6       | 3660.7       |
| GGC AT <sub>1</sub> T TAC T <sub>1</sub> GG                     |           | 3646.6       | 3646.7       |
| GGC AT <sub>1</sub> T <sub>1</sub> T <sub>1</sub> AC TGG        |           | 3632.6       | 3632.8       |
| <b>T<sub>2</sub> - 5-Cl-dU modified DNAs (3' → 5')</b>          | <b>MS</b> | <b>Calcd</b> | <b>Found</b> |
| GGC AT <sub>2</sub> T TAC TGG                                   |           | 3694.6       | 3694.8       |
| GGC AT <sub>2</sub> T TAC T <sub>2</sub> GG                     |           | 3714.5       | 3714.7       |
| GGC AT <sub>2</sub> T <sub>2</sub> T <sub>2</sub> AC TGG        |           | 3734.5       | 3734.7       |
| <b>T<sub>3</sub> - 5-Et-dU modified DNAs (3' → 5')</b>          | <b>MS</b> | <b>Calcd</b> | <b>Found</b> |
| GGC AT <sub>3</sub> T TAC TGG                                   |           | 3688.7       | 3688.8       |
| GGC AT <sub>3</sub> T TAC T <sub>3</sub> GG                     |           | 3702.7       | 3702.8       |
| GGC AT <sub>3</sub> T <sub>3</sub> T <sub>3</sub> AC TGG        |           | 3716.7       | 3716.9       |
| <b>Non-modified DNAs</b>                                        | <b>MS</b> | <b>Calcd</b> | <b>Found</b> |
| 5'-CCG TAA ATG ACC-3'                                           |           | 3612.7       | 3612.5       |
| 3'-GGC ATT TAC TGG-5'                                           |           | 3674.6       | 3674.6       |
| 5'-CCG TGA ATG ACC-3'                                           |           | 3628.7       | 3628.6       |

**Table S4.** DNA sequences, templates and primers, used in the enzymatic studies

| Name        | Sequence, 5'→3'                                                   | Purpose                                                        |
|-------------|-------------------------------------------------------------------|----------------------------------------------------------------|
| P1          | <sup>33</sup> P-CAGGAAACAGCTATGAC                                 | dAxTP incorporation studies                                    |
| T7T         | TTTTTTTGT CATAGCTGTTTCCTG                                         |                                                                |
| P2          | <sup>33</sup> P-CTTGTTGTGCTCCACGGTTA                              | dAxTP with dT <sub>2</sub> TP                                  |
| T37         | CTCGCTATGACACTCGTCTCTTATATGCGTCTAATCAT <u>AACCGTGGAGCACAACAAG</u> | incorporation studies                                          |
| (Cy5) PrFW  | (Cy5) CTCGCTATGACACTCGTCTCTT                                      | Template and primers for PCR amplification of 57bp fragment    |
| (Cy3) PrRV  | (Cy3) CTCGGTAGTTCTGTTGGTCT                                        |                                                                |
| T57         | <u>CTCGCTATGACACTCGTCTCTTATATGCGTCTAATCAAGACCAACAGAACTACCGAG</u>  |                                                                |
| (Cy3) M13RV | (Cy3) AGCGGATAACAATTCACACAGGA                                     | PCR primers for 149bp and 360bp fragment synthesis             |
| (Cy5) M13FW | (Cy5) CGCCAGGGTTTTCCAGTCACGAC                                     |                                                                |
| R67RV       | TTAGTTGATGCGTTCAAGCG                                              | PCR primers for 237bp fragment synthesis                       |
| R67FW       | ATGGAACGAAGTAGCAATGA                                              |                                                                |
| LongFW1     | TAAGGAAGCTAAAATGGAGAAAAAATCAC                                     | Forward primer for synthesis of 523, 1023 and 1541bp fragments |
| LongFW2     | ACAACTTCTTCGCCCCGTTTTCCACATG                                      |                                                                |
| LongRV1     | AACGGGGGCGAAGAAGTTGTCCATATTGGCCAC                                 | Reverse primer for synthesis of 523 and 2569bp fragments       |
| LongRV2     | GTCCGACCGCTGCGCCTTATCCGGTAACTATC                                  |                                                                |
| LongRV3     | TAGCGGAGTG TATACTGGCTTACTATGTTGGCACTGATG                          | Reverse primer for synthesis of 1541bp fragment                |
| LongRV4     | GATTTTTTTCTCCATTTTAGCTTCCTTAGC                                    |                                                                |

**Table S5.** List of plasmids used in this work

| Name    | Company               | Description                                                              | Purpose                               |
|---------|-----------------------|--------------------------------------------------------------------------|---------------------------------------|
| pUC19   | New England Biolabs   | Cloning vector                                                           | PCR template for 149bp fragment       |
| pXEN156 | Laboratory collection | pSU18 derivative, P15A replicon, <i>cat</i> <sup>+</sup> <sup>9,10</sup> | PCR template for 237-2569bp fragments |

## SUPPORTING FIGURES

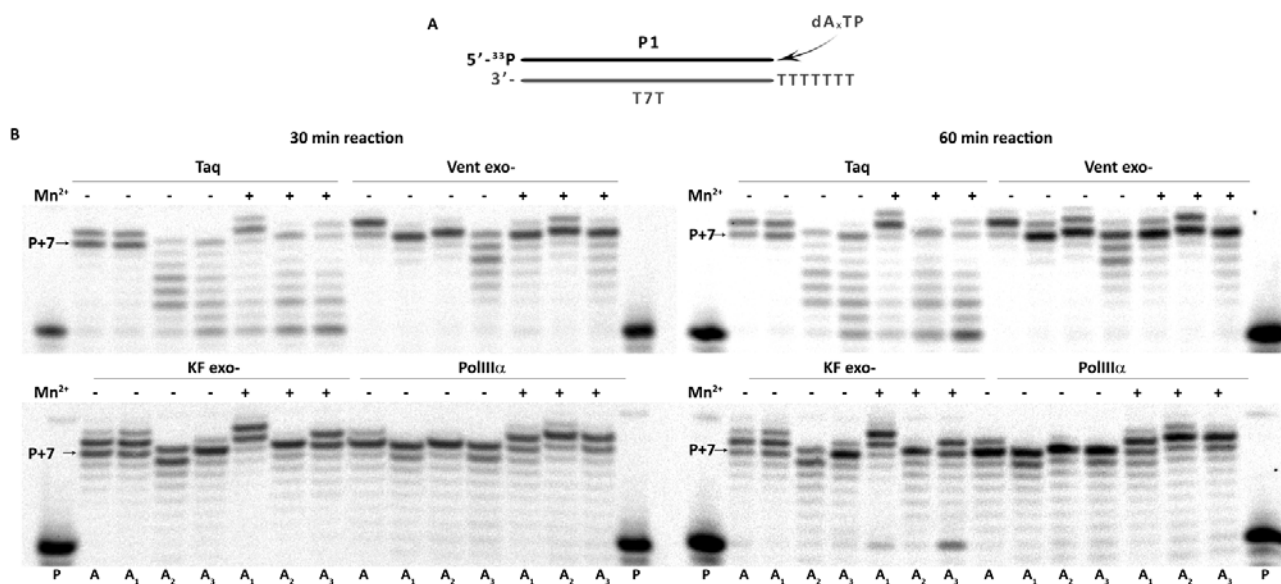

**Fig. S1.** Enzymatic incorporation of modified deoxyadenosine triphosphates (dAxTP) into a 50nM primer-template duplex (P1-T7T) in the presence of 25 U/ml Taq, Vent exo-, KF exo- or 1200 U/ml PolIIIα DNA polymerases. (A) Schematic representation of experiment. (B) Phosphorimages of polymerization reaction with 100μM modified dAxTPs after 30 min or 60 min of reaction in absence or presence of 1mM MnCl<sub>2</sub> P - primer only; P+7 – full length product.

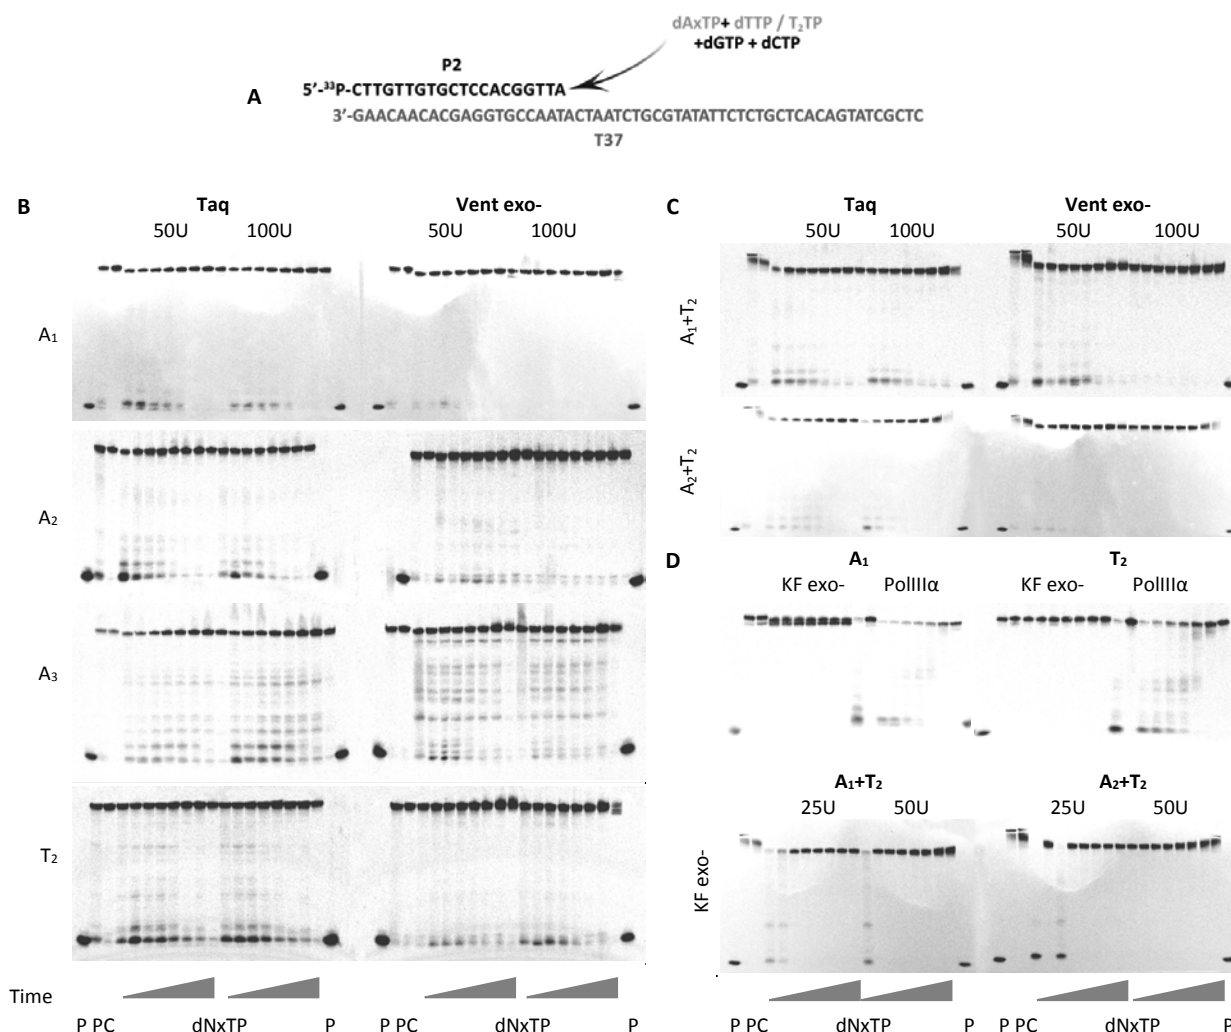

**Fig. S2** Examples of primer extension reactions with dAxTP analogues together with or without 5-Cl-dUTP on a 57mer template. (A) The sequences of primer-template duplex (50nM) used in studies. (B) Product formation catalyzed by thermophilic DNA polymerases, Taq and Vent exo-, in concentration of 50U/ml or 100U/ml and different reaction time, 3-60 min. From top to bottom are listed PAGE images of the incorporation reaction with A<sub>1</sub>, A<sub>2</sub>, A<sub>3</sub> and T<sub>2</sub> triphosphates (200μM) with other non-modified dNTPs. (C) Primer extension catalyzed by thermophilic DNA polymerases, Taq and Vent exo-, in concentration 50U/ml or 100U/ml, with A<sub>1</sub> or A<sub>2</sub> compounds together with T<sub>2</sub> triphosphate, dGTP and dCTP (200μM each). Reactions are stopped at different periods of time (3-60 min). (D) Examples of primer extension catalyzed by mesophilic DNA polymerases, 25 or 50U/ml KF exo- and 2400U/ml PolIIIα, with modified A<sub>1</sub> or A<sub>2</sub> triphosphates, dTTP or 5-Cl-dUTP, together with dGTP and dCTP (200μM each). First shown denaturing PAGE image of the products containing A<sub>1</sub> or T<sub>2</sub>, within reaction time 3-120 min; next products containing A<sub>1</sub> with T<sub>2</sub> or A<sub>2</sub> with T<sub>2</sub> in different periods of time (1-20 min) catalyzed by KF exo-. P – <sup>32</sup>P-labeled primer only, PC-positive control with natural dNTP after minimum and maximum reaction time. dN<sub>x</sub>TP- modified nucleoside triphosphates (A<sub>1</sub>-A<sub>3</sub> and T<sub>2</sub> triphosphates).



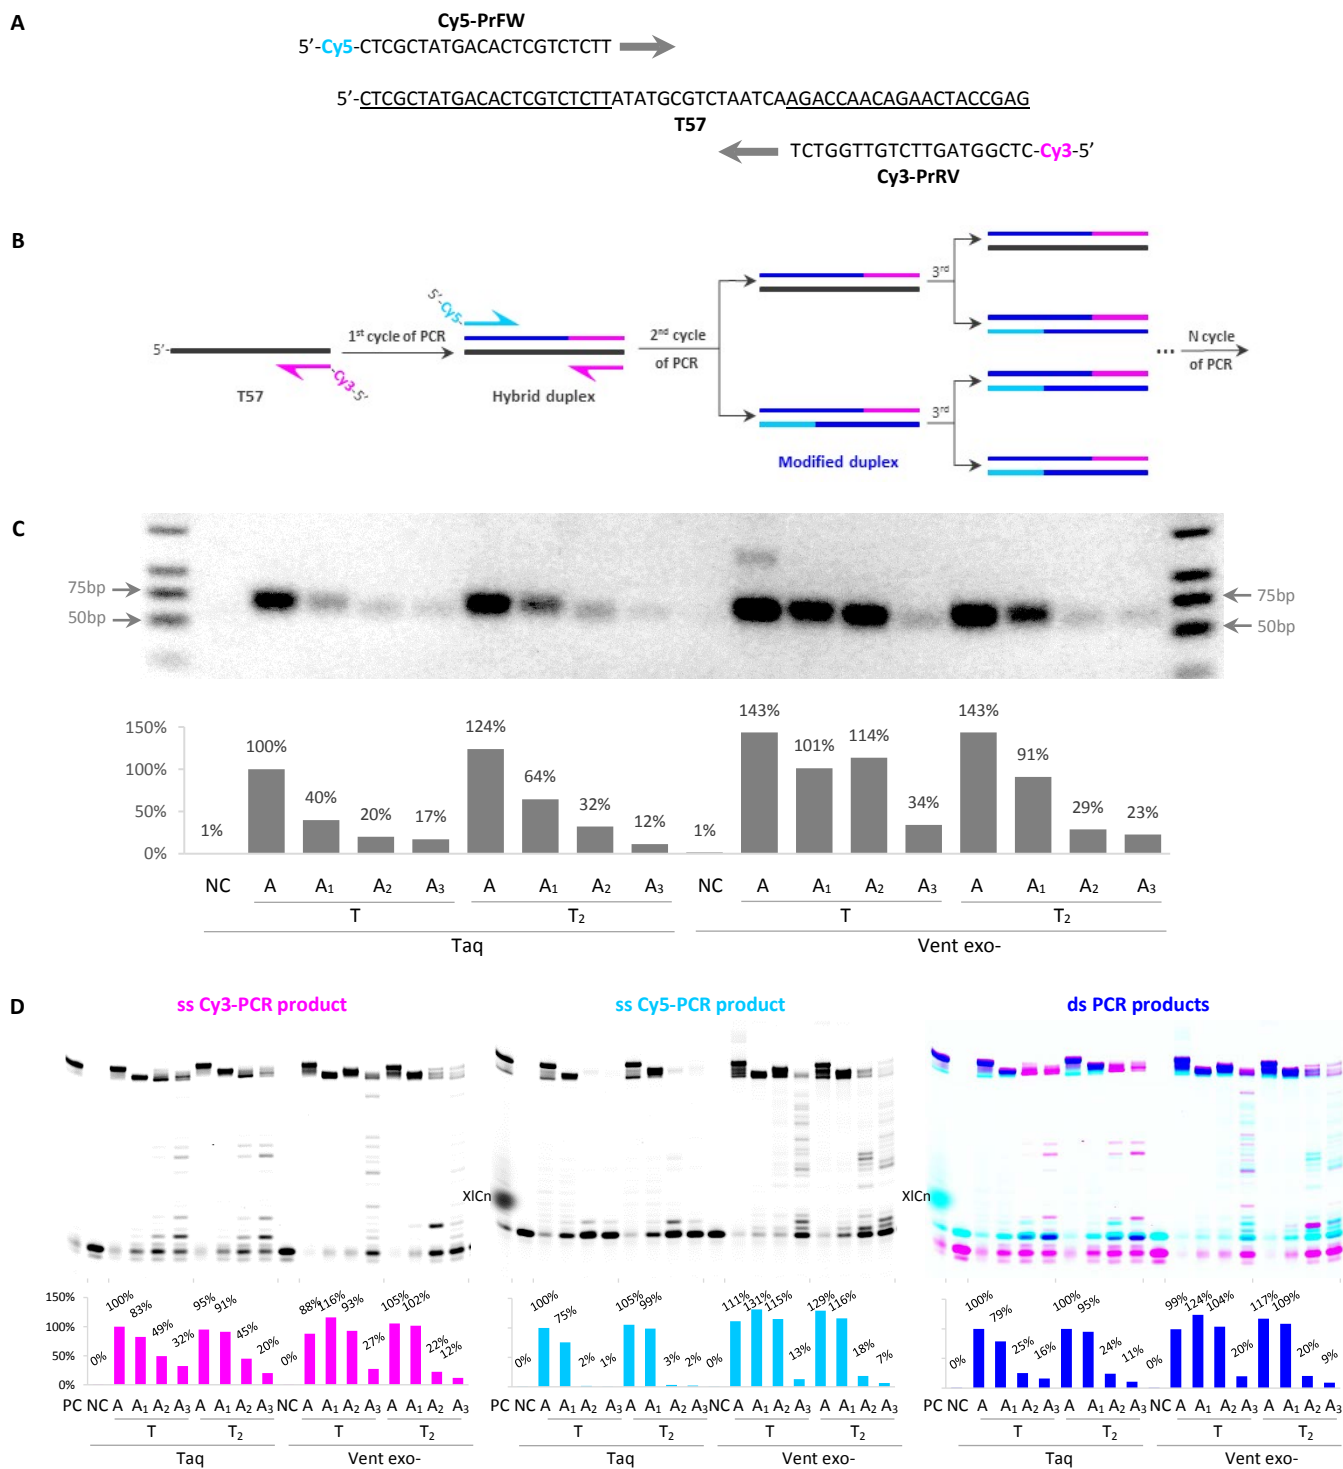

**Fig. S3** PCR amplification of 57mer DNA template in the presence of natural dNTP or dAxTP, dT<sub>2</sub>TP together with dCTP and dGTP triphosphates. (A) Sequences of primers and template used in the PCR assay. (B) Schematic representation of the PCR experiment. (C) Image of 3% agarose gel with relative yields of PCR product formation to the reaction yield of natural PCR product formed by Taq DNA polymerase (below). (D) Image of 15% denaturing PAGE with relative yields below. Cy3- or Cy5-labeled single-stranded (ss) PCR products are shown in pink or in light blue, respectively. Double-stranded (ds) PCR product is shown as dark blue and represents the average yields from Cy3 and Cy5 labeled DNA strands. The yield of natural PCR product formed by Taq polymerase was taken as 100%. PCR reactions were performed with 25 U/ml Taq or Vent exo- DNA polymerases. NC – negative control, PCR without dNTP, PC – Cy3/Cy5 labeled ds T57 template. XICn – xylene cyanol, loading buffer compound (tracking dye).

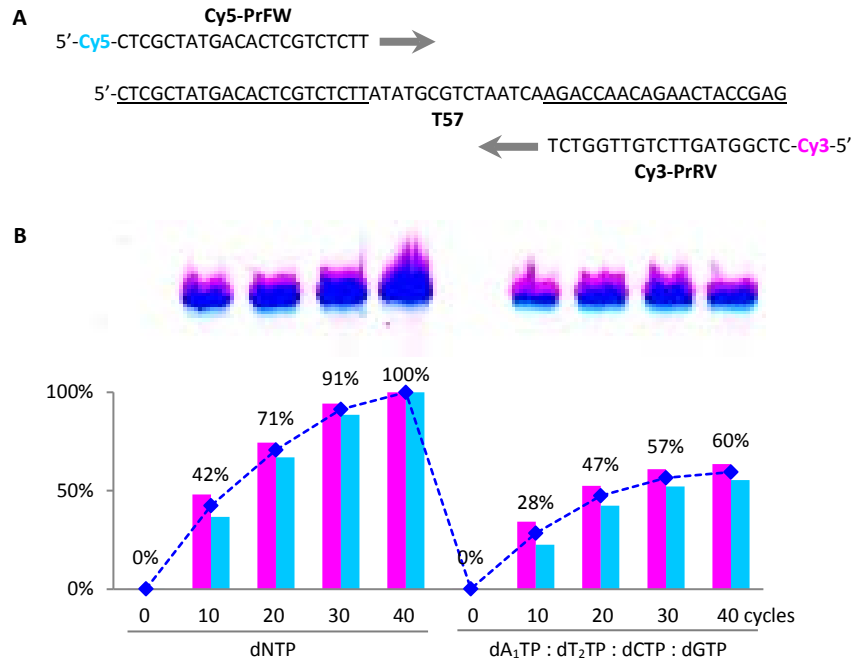

**Fig. S4** PCR amplification of 57mer template in presence of natural or 7-deaza-dA, 5-Cl-dU together with dGTP and dCTP triphosphates. (A) The sequences of primers and template for PCR. (B) Image of 15% denaturing PAGE with relative yields below. Cy3- or Cy5-labeled PCR products are shown in pink or in light blue respectively, total product yield are shown in dark blue. PCR reactions were performed with 25U/ml Taq DNA polymerase. The yield of natural PCR product after 40 PCR cycles was taken as 100%. 3 min of extension time was used.

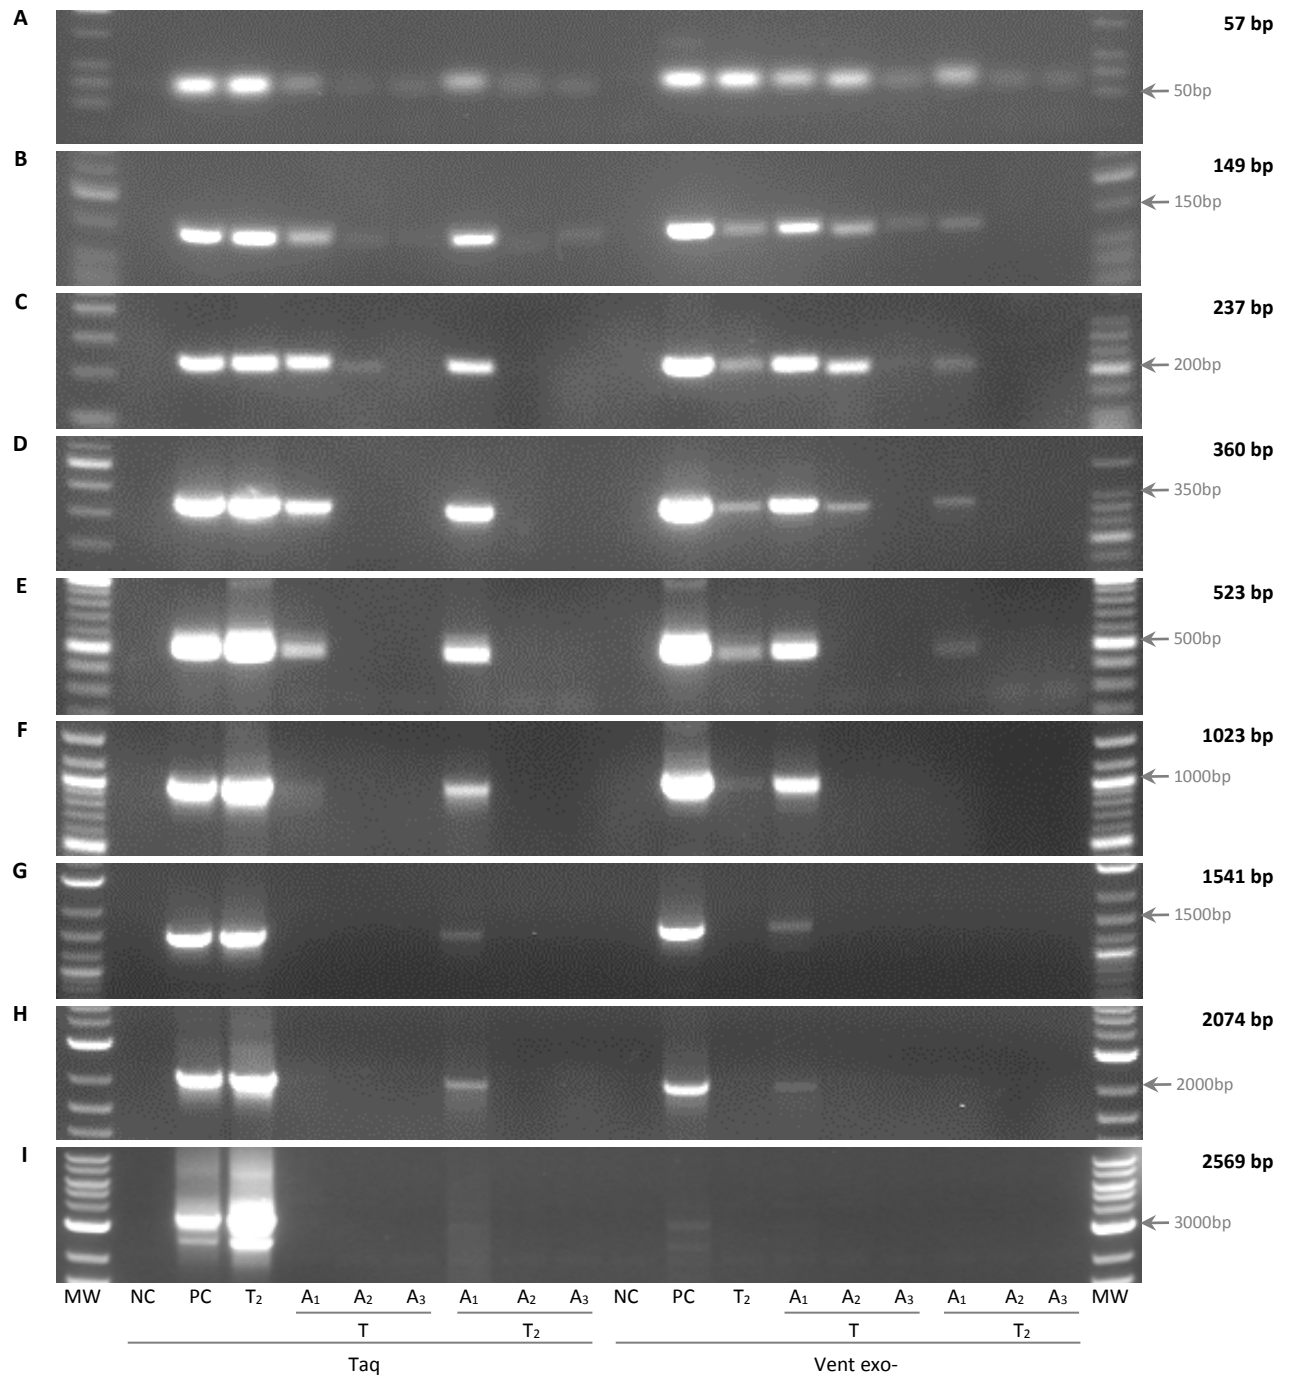

**Fig. S5** PCR amplification of templates with different lengths in presence of natural or dAxTP, 5-Cl-dUTP together with dGTP and dCTP triphosphates. (A-I) Images of agarose gel electrophoresis: (A) 3% gel with 57 bp product, (B) 3% gel with 149 bp product, (C) 2% gel with 237 bp product, (D) 2% gel with 360 bp product, (E) 1% gel with 523 bp product, (F) 1% gel with 1023 bp product, (G) 1% gel with 1541 bp product, (H) 1% gel with 2074 bp product, (I) 1% gel with 2569 bp product. PCR reactions were performed with 25U/ml Taq or Vent exo- DNA polymerases. MW – molecular weights, NC- negative controls, PC – positive controls, PCR with all four natural dNTP.

## REFERENCES

- 1 S. L. Beaucage and M. H. Caruthers, in *Current Protocols in Nucleic Acid Chemistry*, John Wiley & Sons, Inc., Hoboken, NJ, USA, 2001, vol. Chapter 3, p. Unit 3.3.
- 2 Z. Kazimierczuk, U. Binding and F. Seela, *Helv. Chim. Acta*, 1989, **72**, 1527–1536.
- 3 F. Seela, I. Munster, U. Luchner and H. Rosemeyer, *Helv. Chim. Acta*, 1998, **81**, 1139–1155.
- 4 E. K. Ryu and J. N. Kim, *Nucleosides and Nucleotides*, 1989, **8**, 43–48.
- 5 J. Ludwig, *Acta Biochim. Biophys. Acad. Sci. Hung.*, 1981, **16**, 131–3.
- 6 K. Seela, F. Driller, H. Kehne, A. Kaiser, *Chem. Scr.*, 1986, **26**, 173–178.
- 7 J. D. Rose, W. B. Parker, H. Someya, S. C. Shaddix, J. a Montgomery and J. a Secrist, *J. Med. Chem.*, 2002, **45**, 4505–12.
- 8 J. D. Hoheisel and H. Lehrach, *FEBS Lett.*, 1990, **274**, 103–106.
- 9 G. Simon, M. Bouzon, F. Charmantray, V. Hélaine, B. Légeret, P. Marlière and L. Hecquet, *Bioorg. Med. Chem. Lett.*, 2009, **19**, 3767–70.
- 10 E. Ereemeeva, M. Abramov, L. Margamuljana, J. Rozenski, V. Pezo, P. Marlière and P. Herdewijn, *Angew. Chemie Int. Ed.*, 2016, **55**, 7515–7519.
